# Supplementary material for: Longitudinal Natural History Study of Children and Adults with Rare Solid Tumors: Initial Results for First 200 Participants
Source: PubMed Central journal article supplement (PMC10699159; doi:10.1158/2767-9764.crc-23-0247), 2023-12-06
Supplement: crc-23-0247-s02.pdf [file crc-23-0247-s02.pdf]

# SUPPLEMENTAL FIG 1: Distribution of 197 participants in the first 200 enrolled by age group

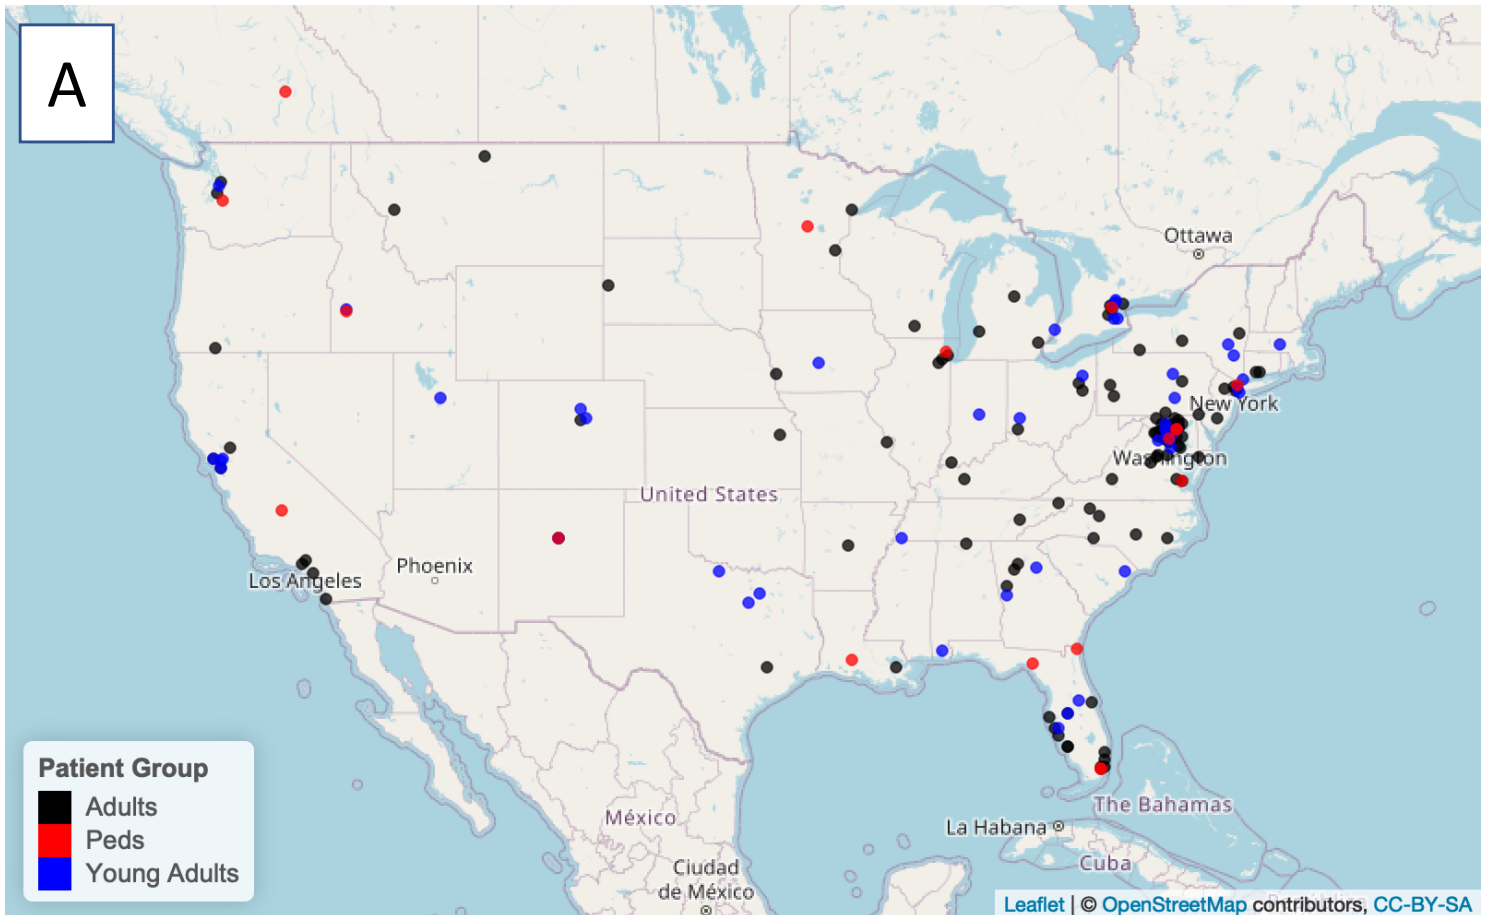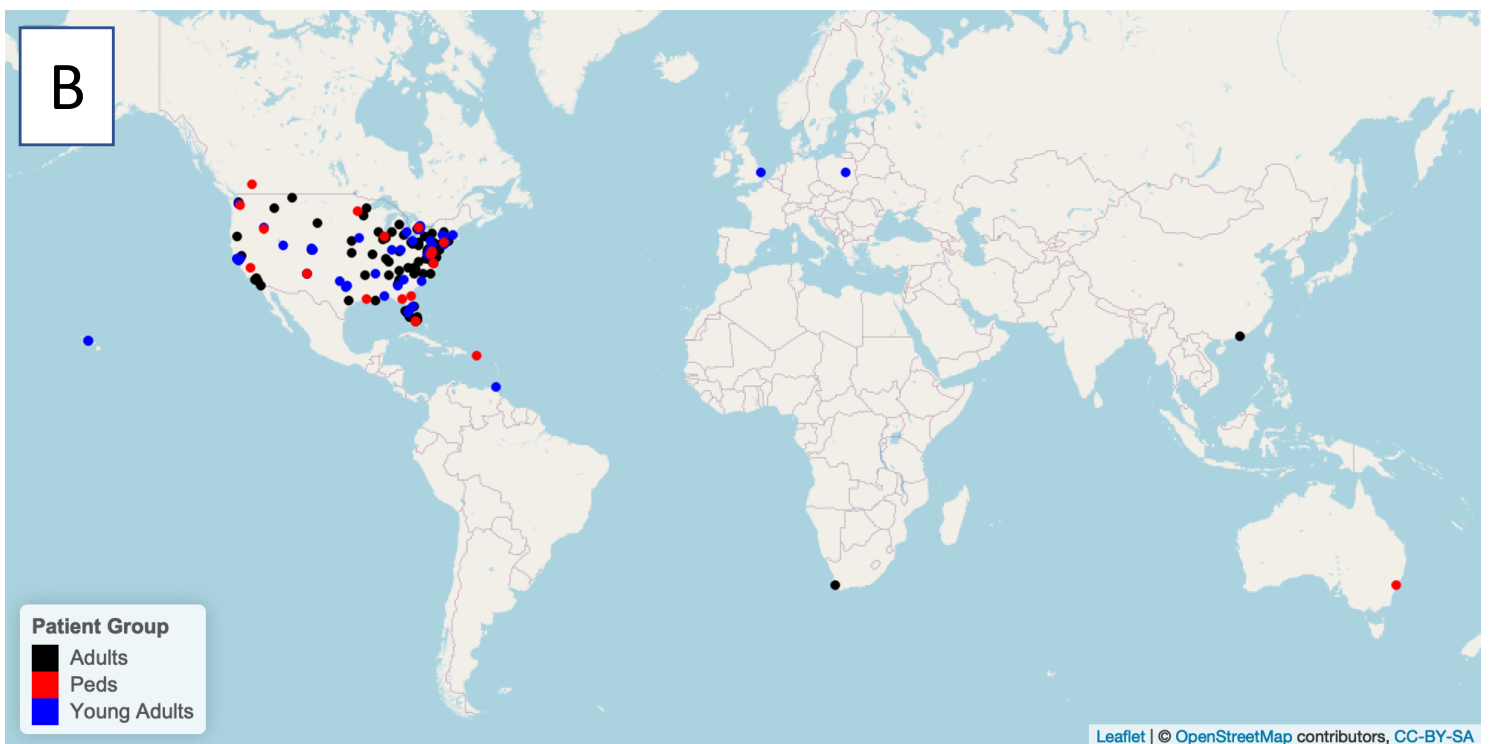

Supplemental Figure 1: Geographic distribution of participants by age group. (A) Distribution of adult ( $\geq 40$  years old; black), pediatric ( $< 18$  years old; red), and young adult ( $\geq 18$  and  $< 40$  years old; blue) participants in 46 US states. (B) International distribution of adult ( $\geq 40$  years old; black), pediatric ( $< 18$  years old; red), and young adult ( $\geq 18$  and  $< 40$  years old; blue) participants in 9 countries spread across 6 continents.
