# Supplementary material for: Longitudinal Natural History Study of Children and Adults with Rare Solid Tumors: Initial Results for First 200 Participants
Source: PubMed Central journal article supplement (PMC10699159; doi:10.1158/2767-9764.crc-23-0247), 2023-12-06
Supplement: crc-23-0247-s03.pdf [file crc-23-0247-s03.pdf]

**SUPPLEMENTAL FIG 2: Age at diagnosis for 180 participants with rare tumors**

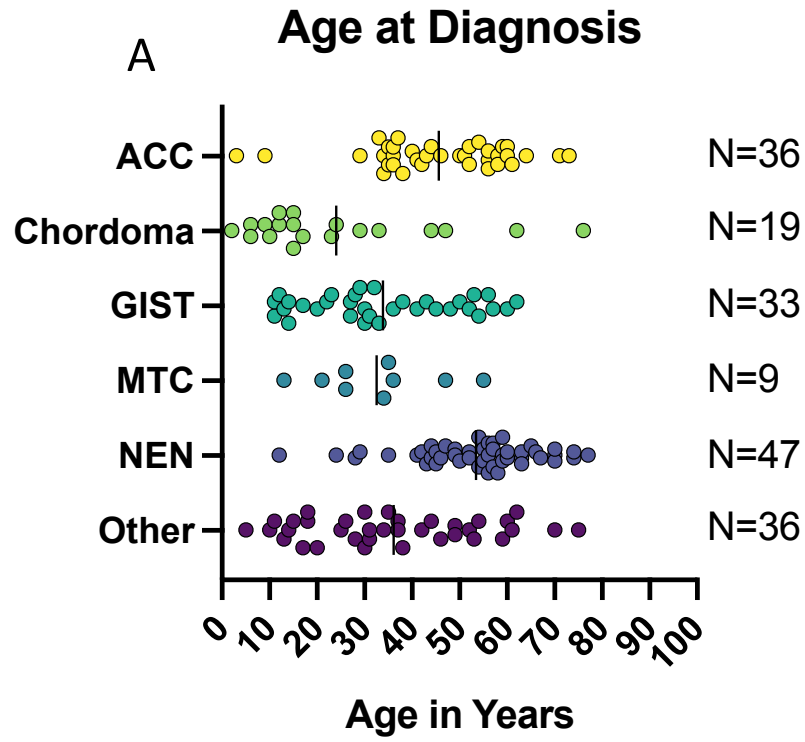

Supplemental Figure 2: Age at diagnosis. Distribution of ages at diagnosis in years (x-axis) by tumor type (y-axis), with NEN showing the oldest average age and chordoma the youngest. Line indicates mean.
