# Supplementary material for: Longitudinal Natural History Study of Children and Adults with Rare Solid Tumors: Initial Results for First 200 Participants
Source: PubMed Central journal article supplement (PMC10699159; doi:10.1158/2767-9764.crc-23-0247), 2023-12-06
Supplement: crc-23-0247-s06.pdf [file crc-23-0247-s06.pdf]

# SUPPLEMENTAL FIG 5: Completion of forms by participants and clinical staff

## Form Completion by Individual Completing the Form

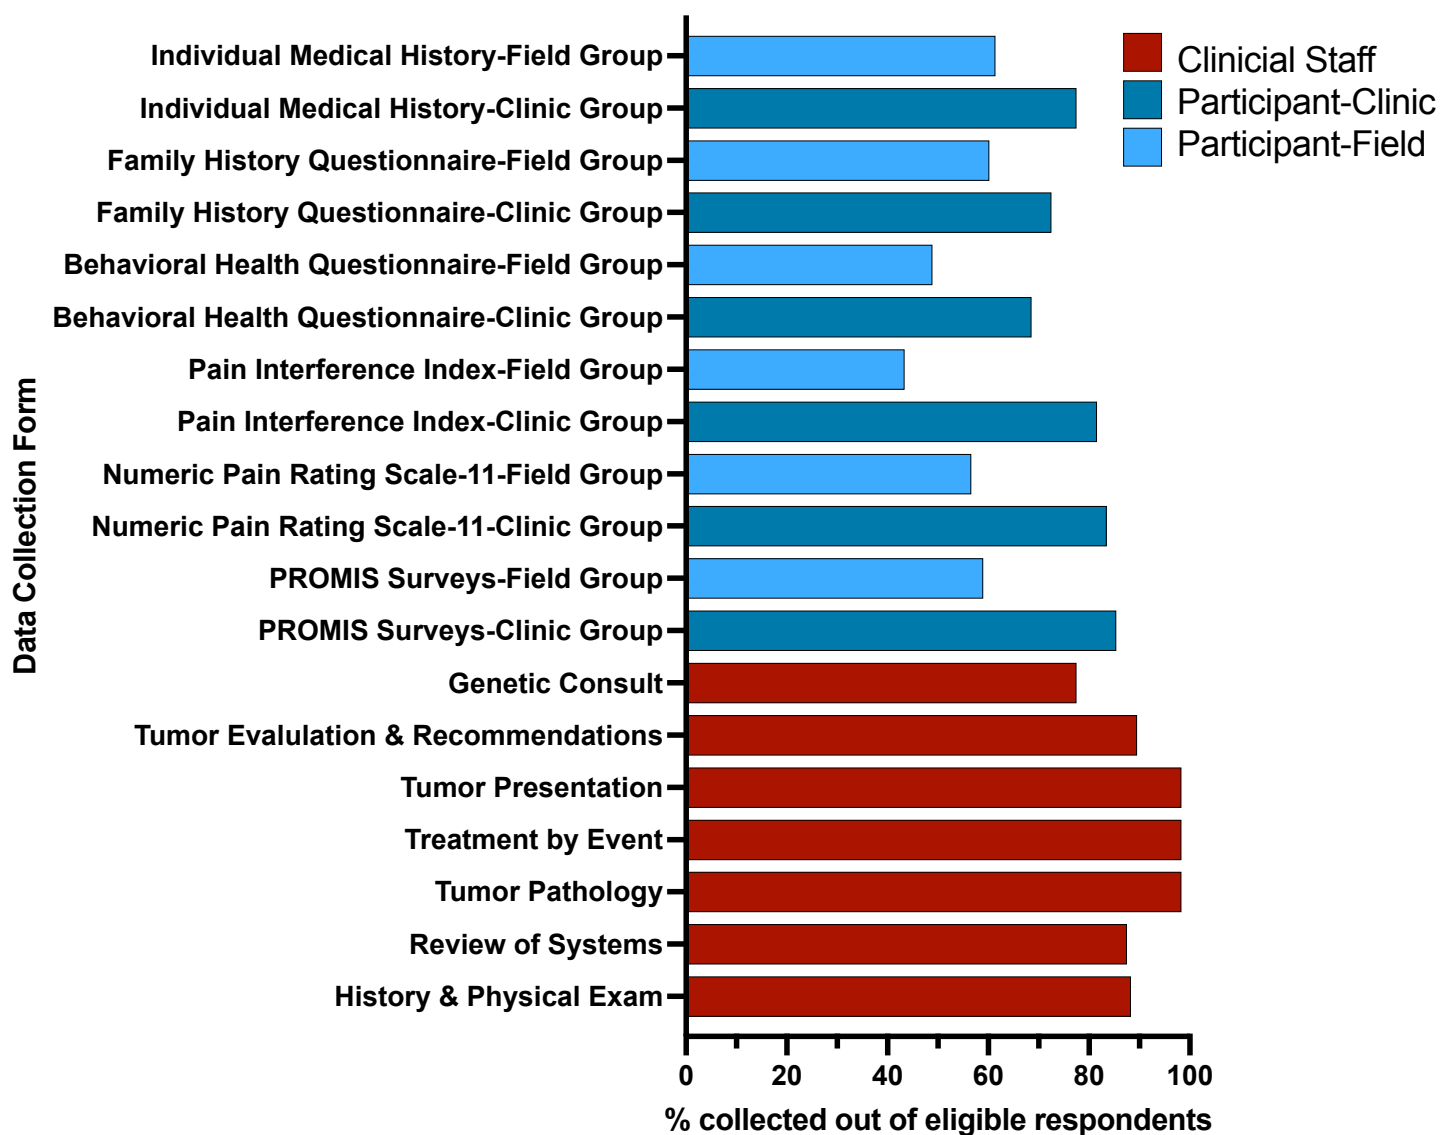

| Form                       | Clinic Group (N=102)  | Field Group (N=91) | P value† |
|----------------------------|-----------------------|--------------------|----------|
| Individual Medical History | 77.5%                 | 61.4%              | 0.0178   |
| Family History             | 72.5%                 | 60.2%              | 0.0893   |
| Behavioral Health          | 68.6%                 | 48.9%              | 0.0075   |
| Form                       | Clinic Group (N=103*) | Field Group (N=83) | P value† |
| Pain Interference          | 81.6%                 | 43.4%              | <0.0001  |
| Numeric Pain Rating        | 83.5%                 | 56.6%              | <0.0001  |
| PROMIS                     | 85.4%                 | 59.0%              | <0.0001  |

\*one non-English speaker was assisted to complete PROs in clinic with help of translator

†two-sided Fisher's exact test

Supplemental Figure 5: Protocol form completion. Forms are indicated by whether they are completed by clinical staff (red), clinic participant (dark blue), or field participant (light blue). The field group completed forms significantly less often than the clinic group (Two-sided Fisher's exact test,  $P < 0.05$  considered statistically significant). Non-English participants (N=7, all in clinic group) were exempt from completing all forms. Family members without a germline mutation (N=5, all in field group) were exempt from completing the Pain Interference Index, Numeric Pain Rating Scale 11, and PROMIS Surveys. The Tumor Evaluation and Recommendation, Genetic Consult, Review of Systems, and History and Physical Exam form completion was only considered for clinic group participants (N=109).
