# Supplementary material for: Longitudinal Natural History Study of Children and Adults with Rare Solid Tumors: Initial Results for First 200 Participants
Source: PubMed Central journal article supplement (PMC10699159; doi:10.1158/2767-9764.crc-23-0247), 2023-12-06
Supplement: crc-23-0247-s07.pdf [file crc-23-0247-s07.pdf]

# SUPPLEMENTAL FIG 6: Time from initial diagnosis to enrollment for 180 participants with rare tumors

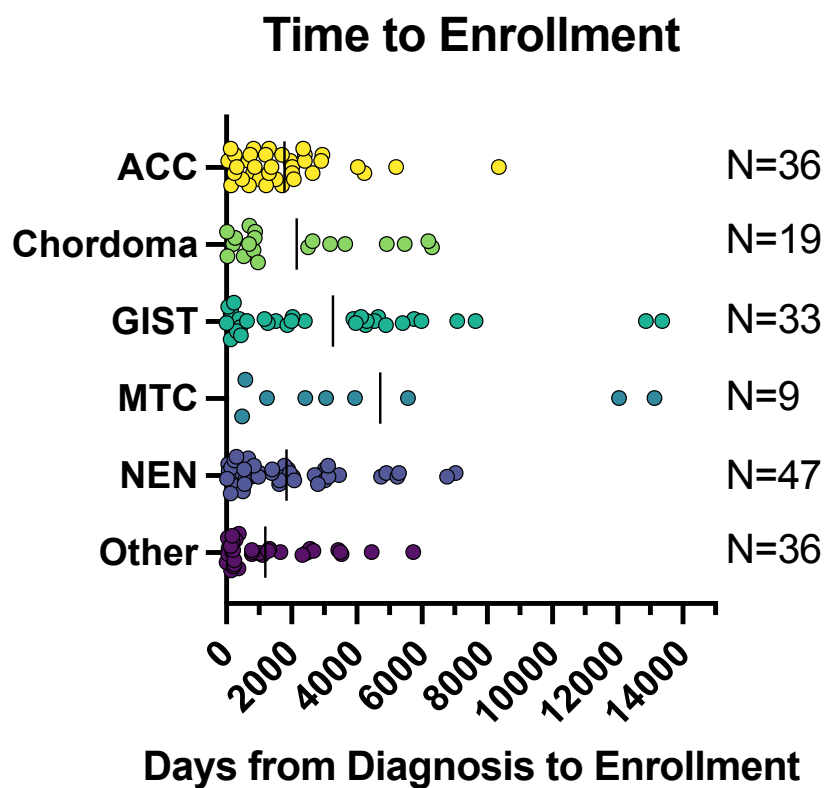

Supplemental Figure 6: Time from diagnosis to enrollment by tumor type. Distribution of the number of days from diagnosis to enrollment (x-axis) for participants by tumor type (y-axis). Line indicates mean.
