# Supplementary material for: Longitudinal Natural History Study of Children and Adults with Rare Solid Tumors: Initial Results for First 200 Participants
Source: PubMed Central journal article supplement (PMC10699159; doi:10.1158/2767-9764.crc-23-0247), 2023-12-06
Supplement: crc-23-0247-s10.pdf [file crc-23-0247-s10.pdf]

# SUPPLEMENTAL FIG 9: Self-reported health issues

## Other Health Issues Self-Reported in ≥ 3 Participants (115 Respondents)

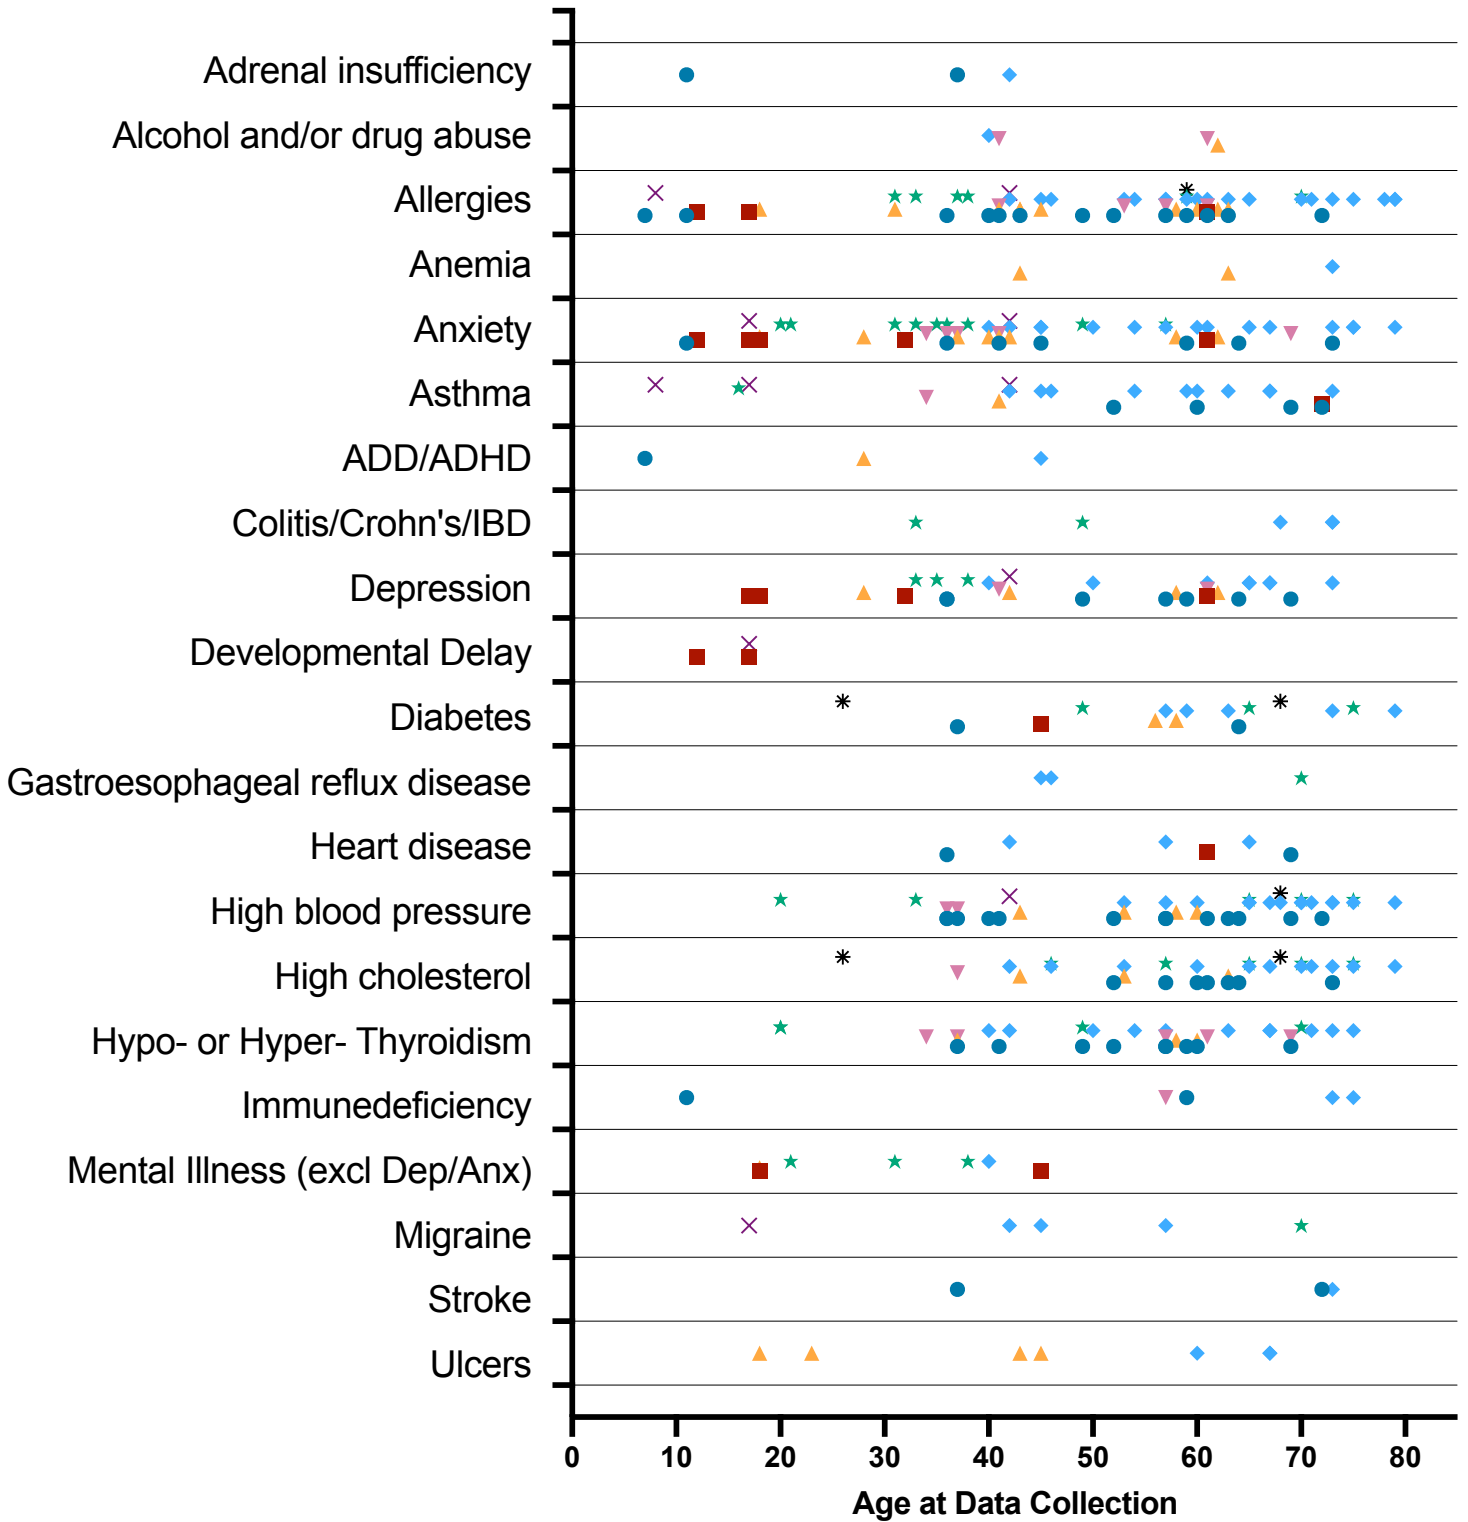

- ACC (N=22; Avg=50)
- Chordoma (N=7; Avg=33)
- ▲ GIST (N=19; Avg=46)
- ▼ MTC (N=8; Avg=47)
- ◆ NEN (N=33; Avg=61)
- ★ Other (N=20; Avg=45)
- ✕ Mutation Carrier (N=3; Avg=27)
- \* Fam Members (N=3; Avg=53)

Supplemental Figure 9: Other health issues reported in 3 or more participants out of 115 respondents by tumor type. The x-axis shows respondents age in years at the time of data collection. The y-axis lists the various health problems reported. The average age for each tumor group is given in the legend.
