# Supplementary material for: Longitudinal Natural History Study of Children and Adults with Rare Solid Tumors: Initial Results for First 200 Participants
Source: PubMed Central journal article supplement (PMC10699159; doi:10.1158/2767-9764.crc-23-0247), 2023-12-06
Supplement: crc-23-0247-s12.pdf [file crc-23-0247-s12.pdf]

**SUPPLEMENTAL FIG 11: Anxiety and depression from time of diagnosis**

**Anxiety-Adults**

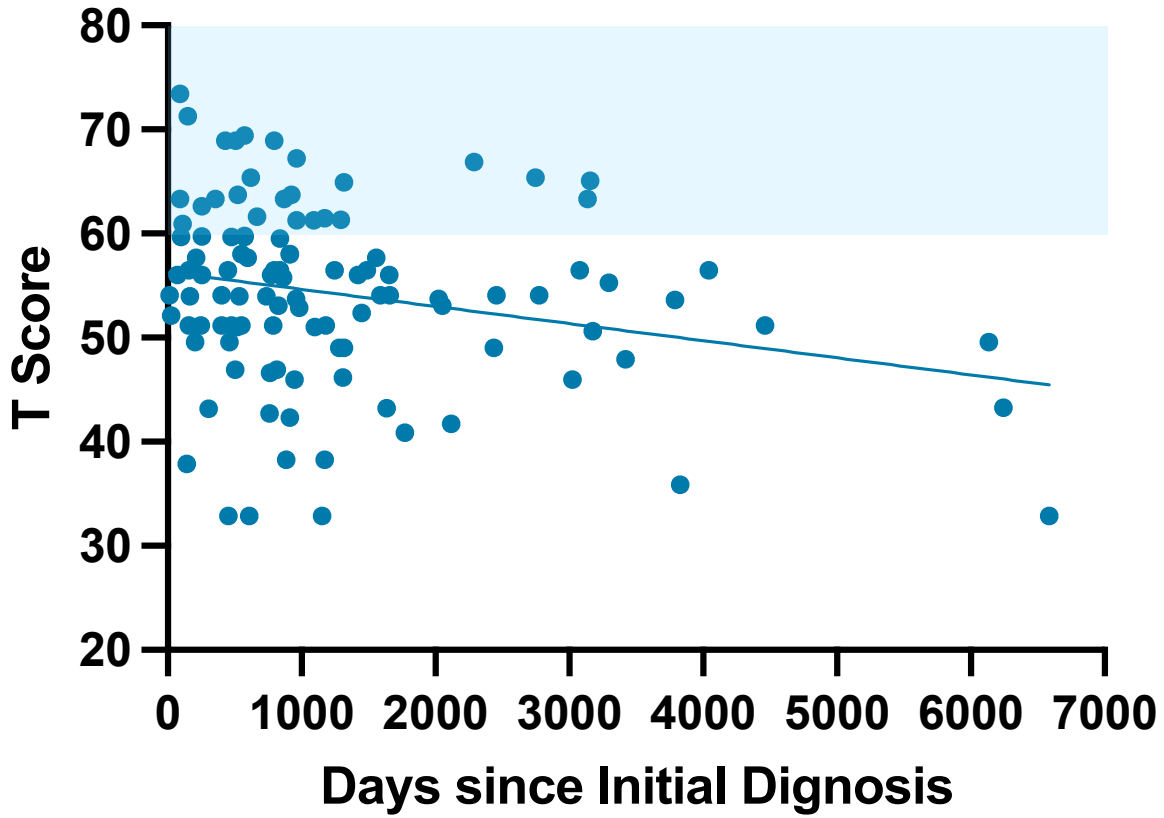

**Depression-Adult**

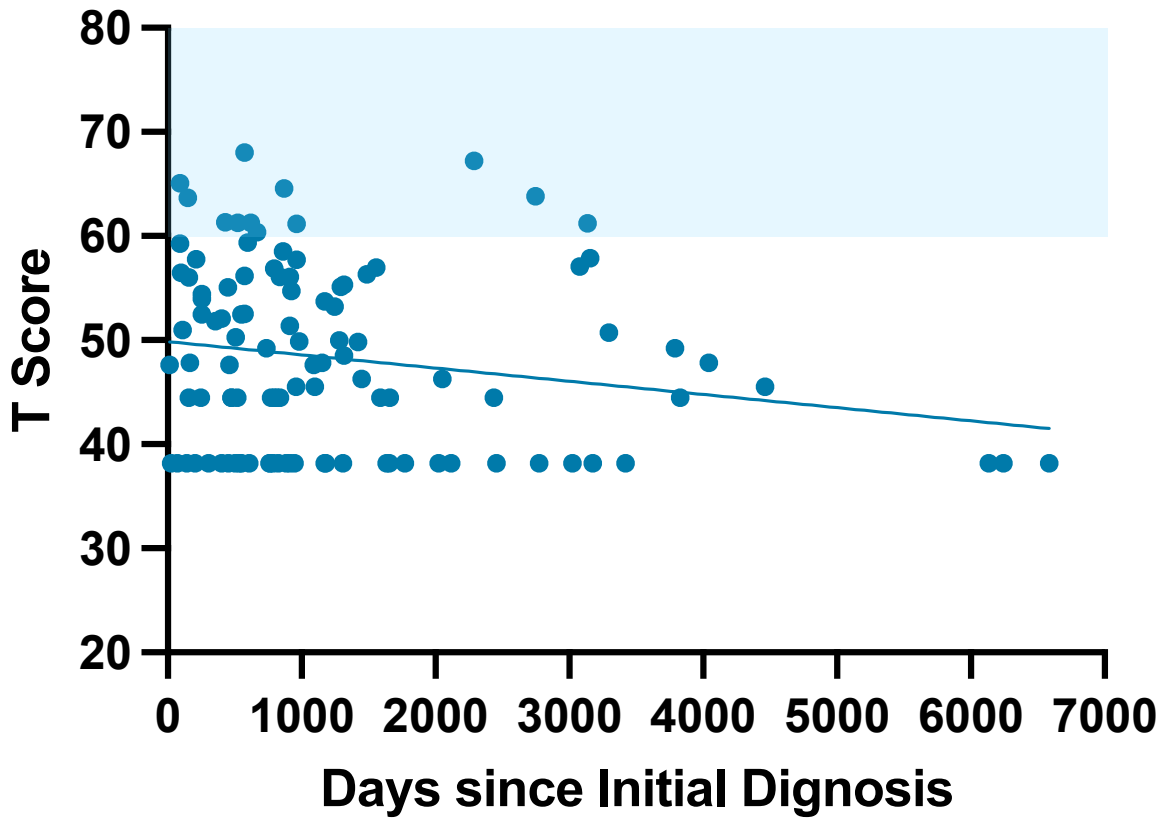

Supplemental Figure 11: Anxiety and depression over time. The T score for anxiety (A) or depression (B) reported by participants with rare tumors (y-axis) is graphed against the days since the participants initial diagnosis (i.e. how long they have lived with a tumor diagnosis) (x-axis). CS levels of anxiety and depression are indicated by the blue box. Anxiety and depression rates trend lower as participants are further from the time of initial diagnosis.
