# Supplementary material for: Longitudinal Natural History Study of Children and Adults with Rare Solid Tumors: Initial Results for First 200 Participants
Source: Cancer Res Commun. 2023 Dec 6;3(12):2468–82. doi: 10.1158/2767-9764.CRC-23-0247 (PMC10699159; doi:10.1158/2767-9764.CRC-23-0247)
Supplement: Supplementary Fig 8 — Example of social and environmental characteristics of the NHRST cohort. [file crc-23-0247-s09.pdf]

SUPPLEMENTAL FIG 8: Social and environmental factors

A Occupations Held for ≥2 yrs  
132 Respondents

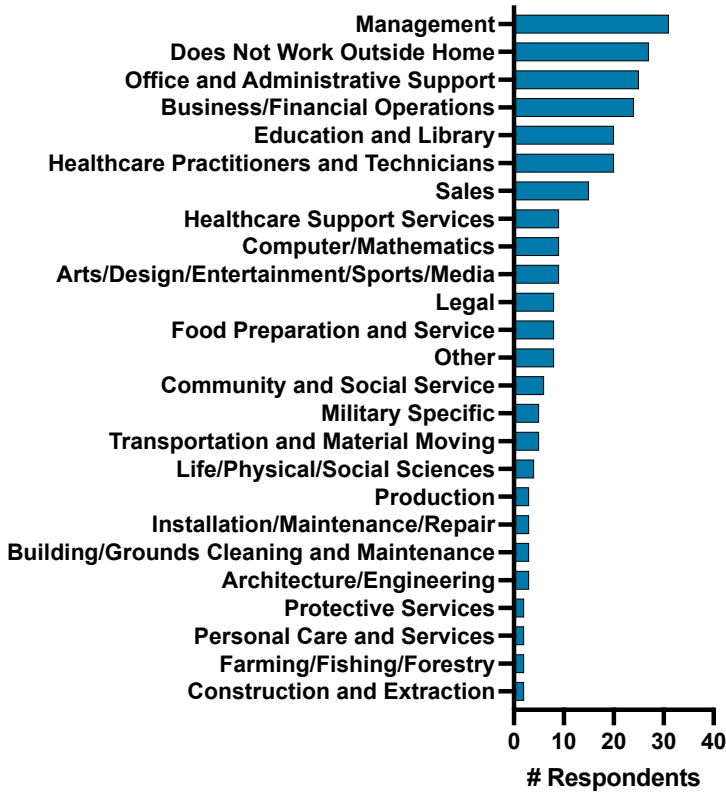

B Education by Age  
120 Respondents

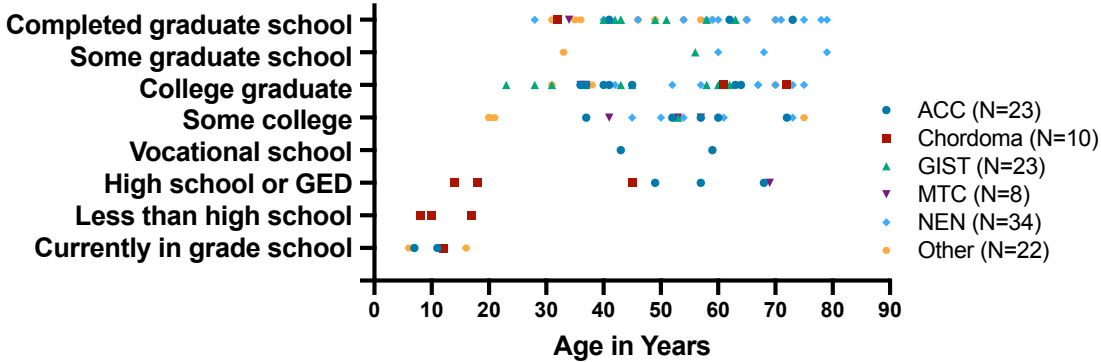

C

Clinic Cohort Usage at Baseline  
104 Participants

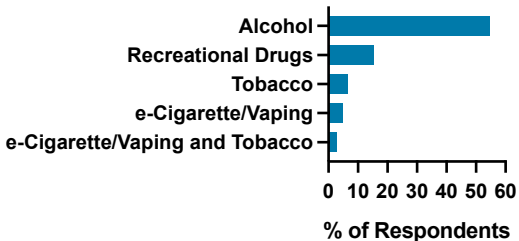

D

Self-Reported Smoking History  
131 Respondents

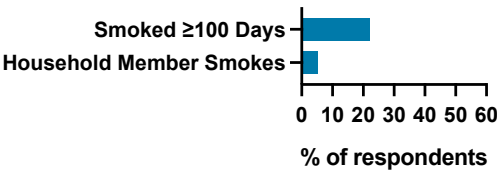

Supplemental Figure 8: Example of social and environmental characteristics of the NHRST cohort.

(A) Occupations held outside of the home for at least two years in 132 responding participants.

(B) Highest level of education attained (y-axis) in 120 responding participants by age (x-axis)

across the tumor types. (C) Alcohol, recreational drug use, and smoking history of the clinic cohort

collected during physical exam medical history interviews at NIHCC. (D) Self-reported data on

tobacco exposure collected from 131 respondents at enrollment.
